# Supplementary material for: Searching for the Fusarium spp. Which Are Responsible for Trichothecene Contamination in Oats Using Metataxonomy to Compare the Distribution of Toxigenic Species in Fields from Spain and the UK
Source: MDPI journal article supplement (doi:10.3390/toxins14090592), 2022-08-28
Supplement: s1 [file s1]

# Supplementary Materials: Searching for the *Fusarium* spp. Which Are Responsible for Trichothecene Contamination in Oats Using Metataxonomy to Compare the Distribution of Toxigenic Species in Fields from Spain and the UK

Jéssica Gil-Serna, Belén Patiño, Carol Verheecke-Vaessen, Covadonga Vázquez and Ángel Medina

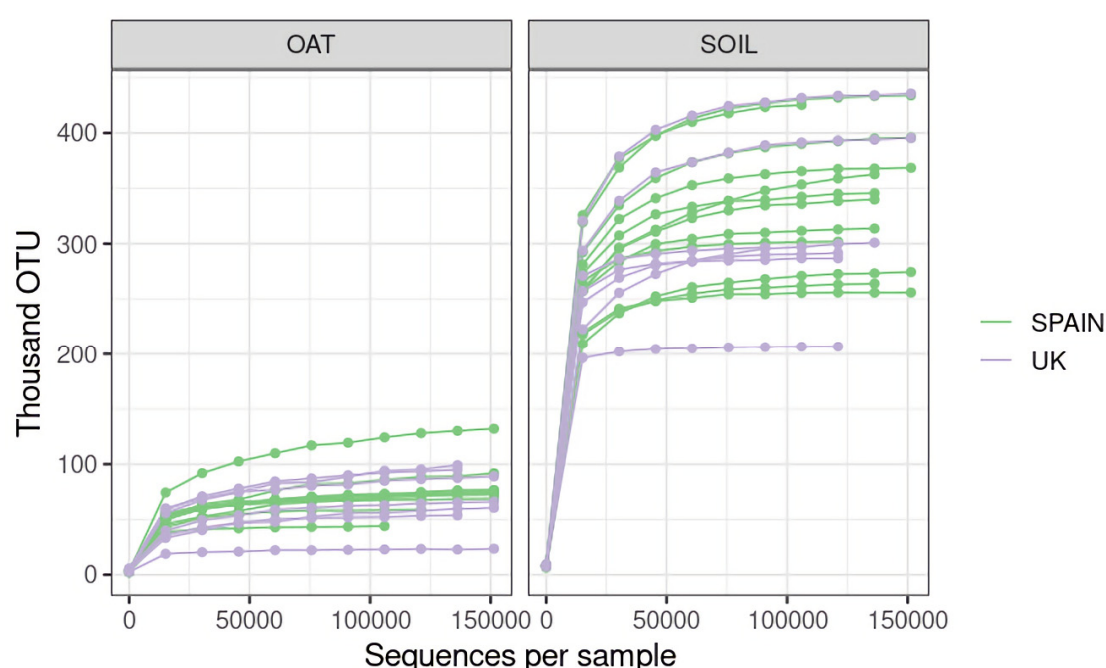

**Figure S1.** Rarefaction curves generated plotting the OTU number against the sequences obtained on each sample.

**Table S1.** Location of the oat fields where the samples were taken.

| Code | Country | Location               | Region     | GPS coordinates          |
|------|---------|------------------------|------------|--------------------------|
| SP1  | Spain   | Santervás de Campos    | Valladolid | 42°13'47.7"N 5°1'5.3"W   |
| SP2  | Spain   | Cervatos de la Cueva   | Palencia   | 42°17'12.6"N 4°45'48.5"W |
| SP3  | Spain   | Villaconancio          | Palencia   | 41°51'54.3"N 4°12'54.5"W |
| SP4  | Spain   | Mayorga                | Valladolid | 42°10'06.0"N 5°14'52.0"W |
| SP5  | Spain   | El Pardo               | Madrid     | 40°31'53.2"N 3°46'54.4"W |
| SP6  | Spain   | Guismondo              | Toledo     | 40°07'51.3"N 4°18'10.7"W |
| SP7  | Spain   | Santa Cruz del Retamar | Toledo     | 40°08'56.5"N 4°17'14.7"W |
| SP8  | Spain   | Nava de Sotrobal       | Salamanca  | 40°52'14.1"N 5°14'38.6"W |
| SP9  | Spain   | Tordillos              | Salamanca  | 40°52'26.4"N 5°14'40.7"W |
| SP10 | Spain   | Macotera               | Salamanca  | 40°49'10.6"N 5°19'2.6"W  |
| SP11 | Spain   | Villatoquite           | Palencia   | 42°12'05.0"N 4°46'32.7"W |
| SP12 | Spain   | Renedo de Esgueva      | Valladolid | 41°39'37.7"N 4°37'55.4"W |

---

|     |    |                         |         |                          |
|-----|----|-------------------------|---------|--------------------------|
| UK1 | UK | Turvey                  | Bedford | 52°10'15.2"N 0°37'19.6"W |
| UK2 | UK | Turvey                  | Bedford | 52°10'42.8"N 0°37'20.1"W |
| UK3 | UK | Carlton and Chellington | Bedford | 52°11'20.3"N 0°34'37.4"W |
| UK4 | UK | Thurleigh               | Bedford | 52°12'49.8"N 0°26'19.8"W |
| UK5 | UK | Bolnhurst and Keysoe    | Bedford | 52°13'00.8"N 0°25'17.3"W |
| UK6 | UK | Riseley                 | Bedford | 52°15'40.5"N 0°27'56.2"W |
| UK7 | UK | Riseley                 | Bedford | 52°14'58.7"N 0°29'16.2"W |

---

**Table S2.** Relative abundance of *Fusarium* spp. found in oat grain samples.

| Sample | Origin | <i>F. brachygibbosum</i> |        | <i>F. cerealis</i>    |        | <i>F. domesticum</i> |         | FEISC             |         |
|--------|--------|--------------------------|--------|-----------------------|--------|----------------------|---------|-------------------|---------|
|        |        | SOIL                     | GRAIN  | SOIL                  | GRAIN  | SOIL                 | GRAIN   | SOIL              | GRAIN   |
| SP1    | Spain  | ND                       | ND     | 1.320%                | ND     | 0.025%               | ND      | 0.455%            | ND      |
| SP2    | Spain  | 1.776%                   | ND     | 0.370%                | ND     | ND                   | 0.001%  | 1.707%            | ND      |
| SP3    | Spain  | ND                       | ND     | 0.428%                | ND     | 0.942%               | ND      | 8.084%            | ND      |
| SP4    | Spain  | 0.001%                   | ND     | 0.159%                | 0.002% | ND                   | ND      | 0.153%            | 0.005%  |
| SP5    | Spain  | 0.961%                   | ND     | 0.021%                | ND     | 0.072%               | 0.001%  | 9.045%            | ND      |
| SP6    | Spain  | 0.952%                   | ND     | 0.003%                | ND     | 0.003%               | ND      | 0.764%            | ND      |
| SP7    | Spain  | 2.130%                   | ND     | ND                    | ND     | ND                   | ND      | 1.967%            | ND      |
| SP8    | Spain  | 1.700%                   | ND     | 0.005%                | ND     | ND                   | ND      | 0.996%            | ND      |
| SP9    | Spain  | 0.521%                   | ND     | 0.066%                | ND     | ND                   | ND      | 0.627%            | ND      |
| SP10   | Spain  | 0.526%                   | ND     | 1.787%                | ND     | ND                   | ND      | 1.070%            | ND      |
| SP11   | Spain  | 0.032%                   | ND     | 0.022%                | ND     | ND                   | ND      | 2.089%            | ND      |
| SP12   | Spain  | ND                       | 0.001% | 0.938%                | ND     | 0.584%               | ND      | 9.114%            | 0.002%  |
|        |        |                          |        |                       |        |                      |         |                   |         |
| UK1    | UK     | ND                       | ND     | 5.419%                | 0.134% | 0.054%               | ND      | 0.224%            | ND      |
| UK2    | UK     | ND                       | ND     | 10.478%               | 0.001% | 0.007%               | ND      | 0.139%            | 0.004%  |
| UK3    | UK     | ND                       | ND     | 22.031%               | 0.006% | 0.015%               | ND      | 0.173%            | ND      |
| UK4    | UK     | ND                       | ND     | 5.286%                | 0.570% | 0.082%               | ND      | 0.966%            | 0.002%  |
| UK5    | UK     | ND                       | ND     | 10.991%               | 0.003% | ND                   | ND      | 0.467%            | ND      |
| UK6    | UK     | ND                       | ND     | 12.388%               | ND     | ND                   | ND      | 0.235%            | ND      |
| UK7    | UK     | ND                       | ND     | 11.294%               | 0.243% | 0.395%               | ND      | 0.301%            | ND      |
|        |        |                          |        |                       |        |                      |         |                   |         |
| Sample | Origin | <i>F. langsethiae</i>    |        | <i>F. merismoides</i> |        | <i>F. poae</i> II    |         | <i>F. poae</i> IV |         |
|        |        | SOIL                     | GRAIN  | SOIL                  | GRAIN  | SOIL                 | GRAIN   | SOIL              | GRAIN   |
| SP1    | Spain  | ND                       | ND     | 0.381%                | ND     | 0.500%               | ND      | 0.020%            | 0.070%  |
| SP2    | Spain  | ND                       | 0.002% | 0.701%                | ND     | 2.321%               | ND      | ND                | 1.351%  |
| SP3    | Spain  | ND                       | 0.003% | 0.636%                | ND     | 0.268%               | ND      | 0.012%            | 3.239%  |
| SP4    | Spain  | ND                       | ND     | 0.210%                | ND     | 0.375%               | 0.236%  | ND                | 0.141%  |
| SP5    | Spain  | ND                       | ND     | 0.063%                | ND     | 1.942%               | ND      | ND                | ND      |
| SP6    | Spain  | ND                       | ND     | 0.922%                | ND     | 3.156%               | ND      | ND                | ND      |
| SP7    | Spain  | ND                       | ND     | 0.068%                | ND     | 0.732%               | 0.002%  | ND                | ND      |
| SP8    | Spain  | ND                       | ND     | 0.132%                | ND     | 7.457%               | 0.003%  | ND                | ND      |
| SP9    | Spain  | ND                       | ND     | 0.287%                | ND     | 5.294%               | 0.072%  | ND                | 0.002%  |
| SP10   | Spain  | ND                       | ND     | 0.317%                | ND     | 9.172%               | ND      | ND                | 2.051%  |
| SP11   | Spain  | ND                       | 0.003% | 0.713%                | ND     | 0.199%               | ND      | ND                | 0.334%  |
| SP12   | Spain  | ND                       | ND     | 2.780%                | ND     | 0.106%               | ND      | ND                | 0.004%  |
|        |        |                          |        |                       |        |                      |         |                   |         |
| UK1    | UK     | ND                       | 0.001% | 2.010%                | ND     | 0.780%               | 4.119%  | 0.065%            | 0.691%  |
| UK2    | UK     | ND                       | ND     | 1.576%                | ND     | 0.073%               | 0.153%  | 0.025%            | 2.474%  |
| UK3    | UK     | ND                       | 0.009% | 1.652%                | ND     | 0.651%               | 26.158% | 0.002%            | 10.828% |
| UK4    | UK     | ND                       | ND     | 3.710%                | ND     | 0.314%               | 2.510%  | 0.160%            | 12.150% |
| UK5    | UK     | ND                       | ND     | 1.852%                | ND     | 0.077%               | 9.449%  | 0.025%            | 4.456%  |
| UK6    | UK     | ND                       | ND     | 1.817%                | ND     | 0.541%               | 4.146%  | 0.026%            | 4.600%  |
| UK7    | UK     | ND                       | 0.001% | 1.250%                | ND     | 6.684%               | 4.094%  | 1.302%            | 1.239%  |

| Sample | Origin | <i>F. redolens</i> |        | FSSC   |       | FTSC   |         | <i>F. vert./F. subgl.</i> |        |
|--------|--------|--------------------|--------|--------|-------|--------|---------|---------------------------|--------|
|        |        | SOIL               | GRAIN  | SOIL   | GRAIN | SOIL   | GRAIN   | SOIL                      | GRAIN  |
| SP1    | Spain  | 0.108%             | ND     | ND     | ND    | 5.915% | 0.265%  | 0.007%                    | ND     |
| SP2    | Spain  | 0.204%             | ND     | ND     | ND    | 0.731% | 0.003%  | 0.014%                    | ND     |
| SP3    | Spain  | 0.110%             | ND     | 0.004% | ND    | 4.356% | 0.008%  | 0.007%                    | 0.010% |
| SP4    | Spain  | 0.216%             | 0.002% | ND     | ND    | 1.955% | 0.009%  | 0.007%                    | ND     |
| SP5    | Spain  | 0.058%             | ND     | 0.002% | ND    | 0.499% | 0.029%  | 0.010%                    | 0.001% |
| SP6    | Spain  | 0.194%             | ND     | ND     | ND    | 3.797% | 0.008%  | 0.045%                    | ND     |
| SP7    | Spain  | 0.662%             | ND     | ND     | ND    | 2.878% | ND      | 0.001%                    | ND     |
| SP8    | Spain  | 0.196%             | ND     | 0.019% | ND    | 0.123% | ND      | 0.046%                    | ND     |
| SP9    | Spain  | 1.205%             | ND     | 0.004% | ND    | 0.835% | ND      | 0.105%                    | 0.001% |
| SP10   | Spain  | 0.956%             | ND     | ND     | ND    | 0.681% | ND      | 0.046%                    | ND     |
| SP11   | Spain  | 0.293%             | ND     | ND     | ND    | 8.347% | 0.011%  | 0.007%                    | ND     |
| SP12   | Spain  | 1.035%             | 0.002% | 0.257% | ND    | 0.642% | 0.007%  | 0.006%                    | 0.003% |
| UK1    | UK     | 0.861%             | ND     | 0.196% | ND    | 0.698% | 0.042%  | 0.003%                    | ND     |
| UK2    | UK     | 0.430%             | ND     | 0.943% | ND    | 0.067% | 0.119%  | ND                        | 0.001% |
| UK3    | UK     | 1.356%             | ND     | 0.114% | ND    | 0.171% | 0.596%  | 0.014%                    | 0.001% |
| UK4    | UK     | 0.150%             | ND     | 0.509% | ND    | 1.262% | 2.031%  | 0.001%                    | ND     |
| UK5    | UK     | 0.219%             | ND     | 0.100% | ND    | 2.231% | 26.895% | ND                        | 0.018% |
| UK6    | UK     | 0.332%             | ND     | 0.035% | ND    | 0.497% | 45.962% | 0.004%                    | ND     |
| UK7    | UK     | 2.754%             | ND     | 0.188% | ND    | 0.685% | 0.468%  | 0.021%                    | ND     |

ND: Not detected. Only the OTU which were present in two or more samples and with a count higher than 10 in at least one sample are represented.
